# Supplementary material for: Risk of tuberculosis in patients with diabetes: population based cohort study using the UK Clinical Practice Research Datalink
Source: PubMed Central journal article supplement (PMC4470065; doi:10.1186/s12916-015-0381-9), 2015-06-05

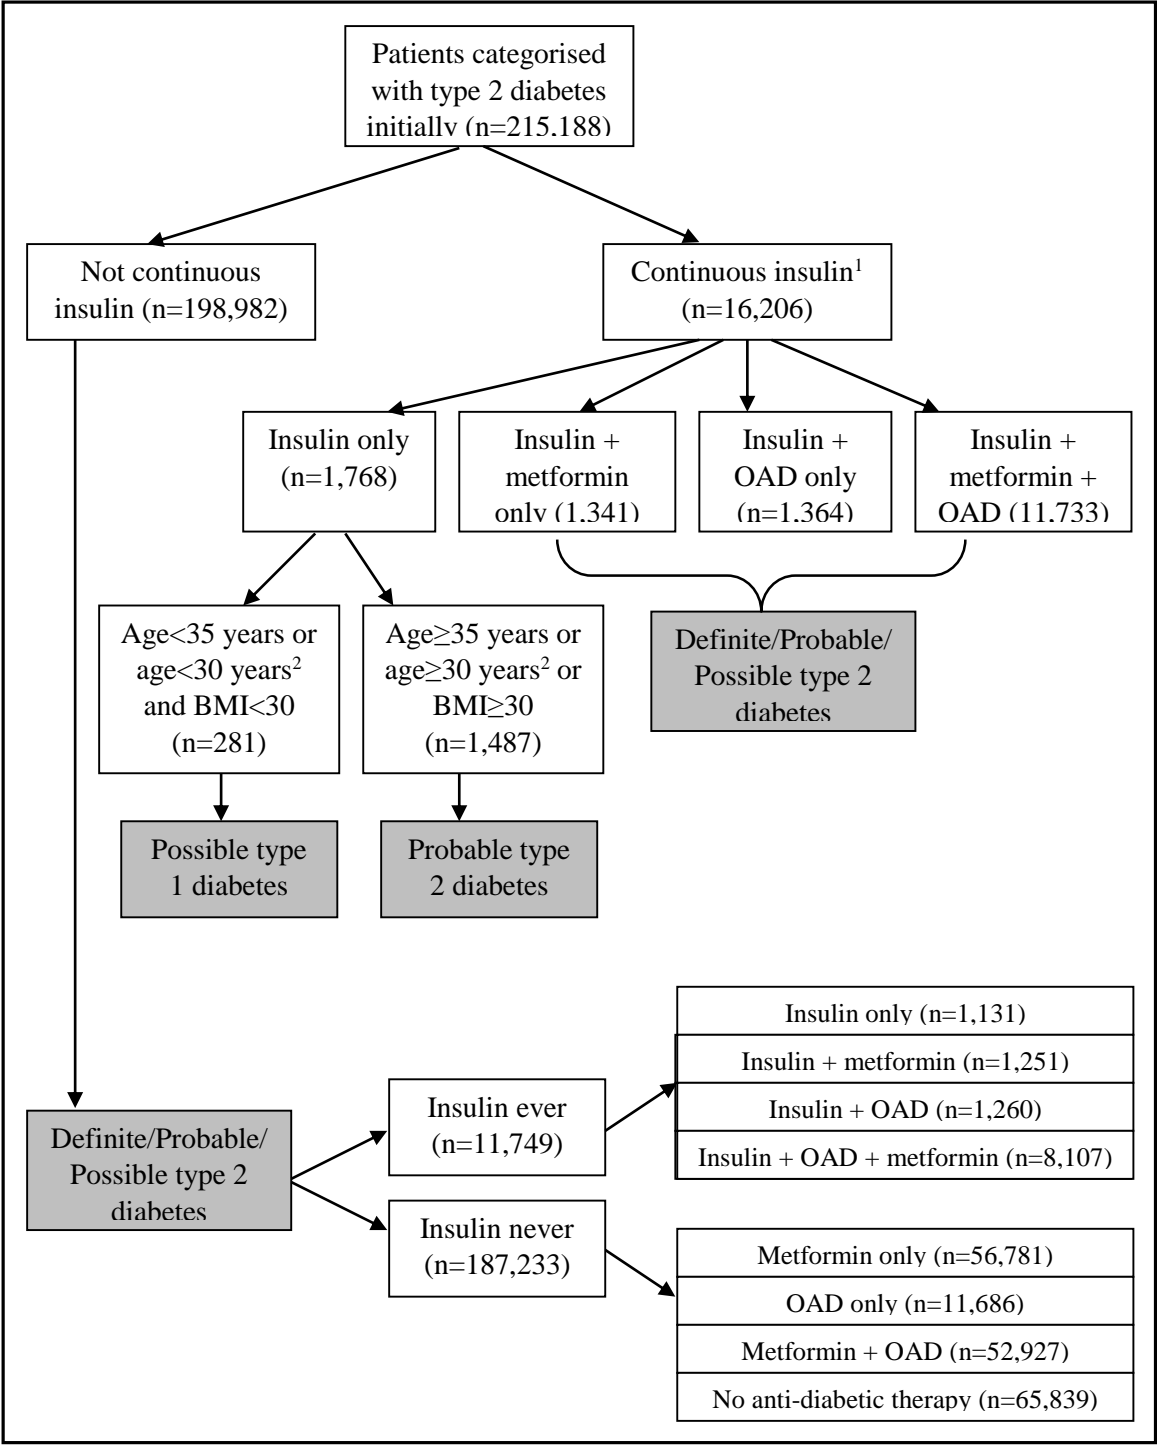

Supplement: 12916_2015_381_MOESM2_ESM.pdf [file 12916_2015_381_MOESM2_ESM.pdf]
